# Supplementary material
Source: publisher site journal article supplement (https://www.spandidos-publications.com/2207/downloadSupplementary)

Figure S1. Effect of auranofin on Trx1 levels in Calu-6 and A549 cells. Exponentially growing cells were incubated in the presence of the indicated concentrations of auranofin for 24 h. Protein extracts were resolved by 12.5% SDS-PAGE gel, transferred to PVDF membranes, and immunoblotted with the indicated antibodies. Western blot analysis reveals the levels of Trx1 and GAPDH in Calu-6 (A) and A549 cells (B).

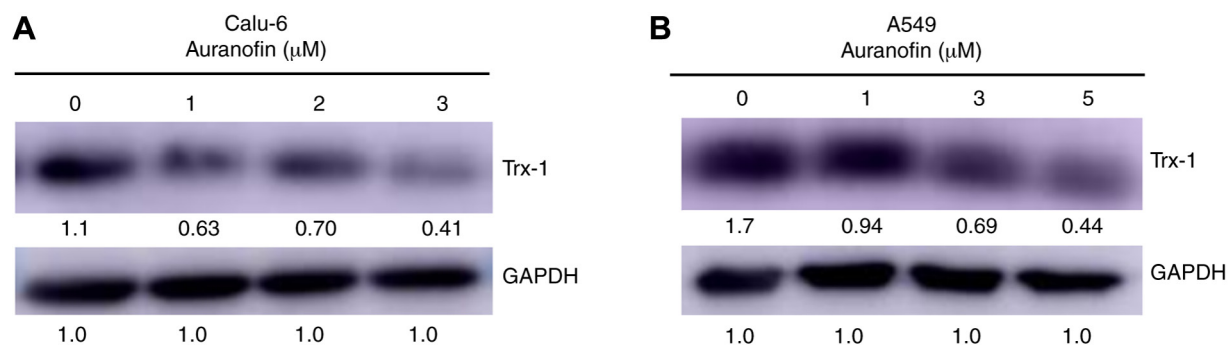

Supplement: Supplementary file 1 [file downloadSupplementary]
